# Supplementary material
Source: Springer Nature journal article supplement (https://www.springermedizin.de/resource/supplementary/12876_2008_286_MOESM3_ESM.pdf/9439088)

$p < 0.0001$ , Kruskal-Wallis test

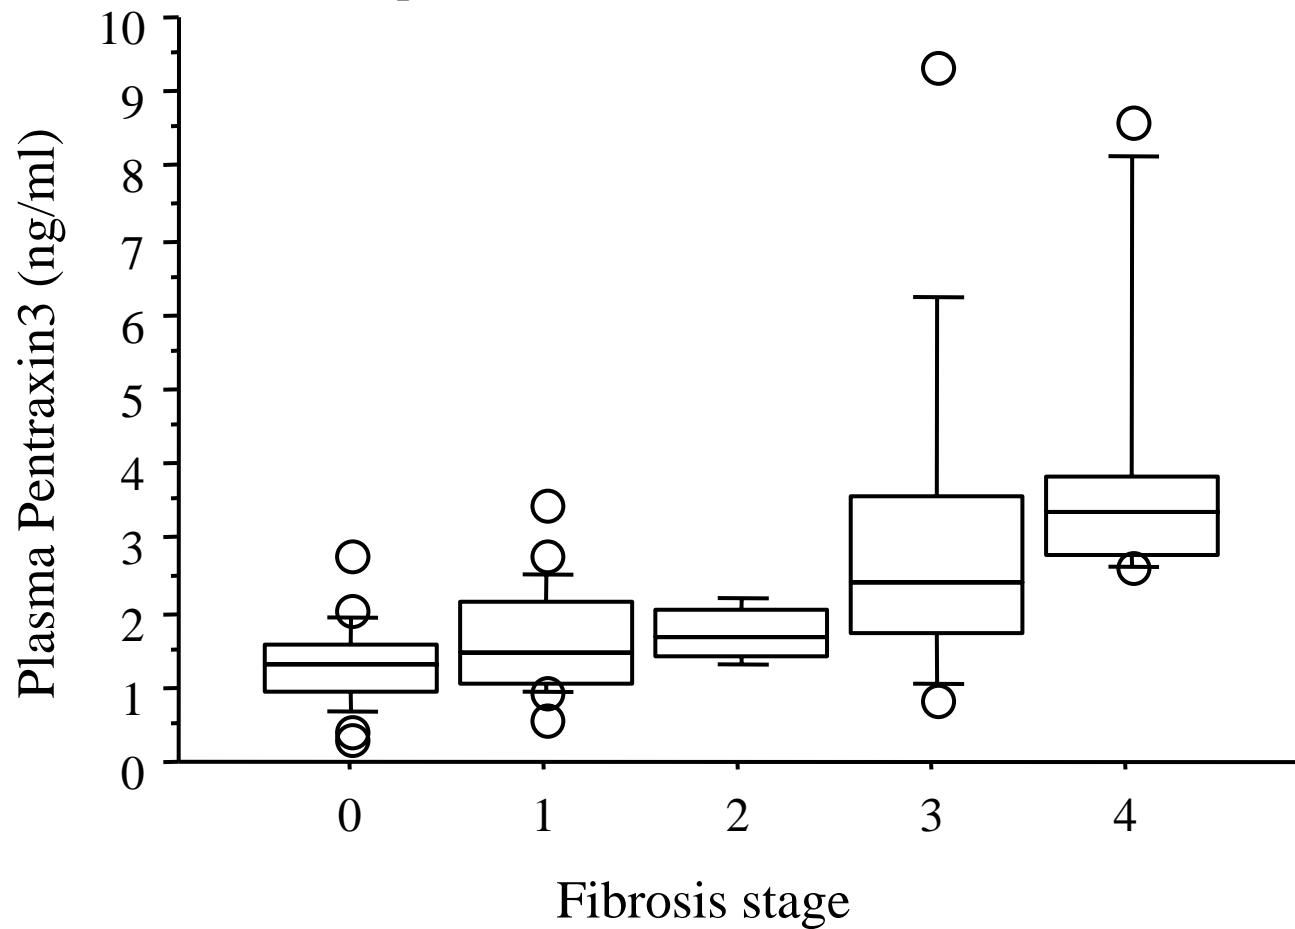

Supplement: MOESM3 [file 9439088]
